# Supplementary material
Source: HighWire-hosted journal article supplement (https://jnm.snmjournals.org/highwire/filestream/95183/field_highwire_adjunct_files/0/184218_Supplemental_Data.pdf)
Supplement: 184218_Supplemental_Data.pdf [file 184218_Supplemental_Data.pdf]

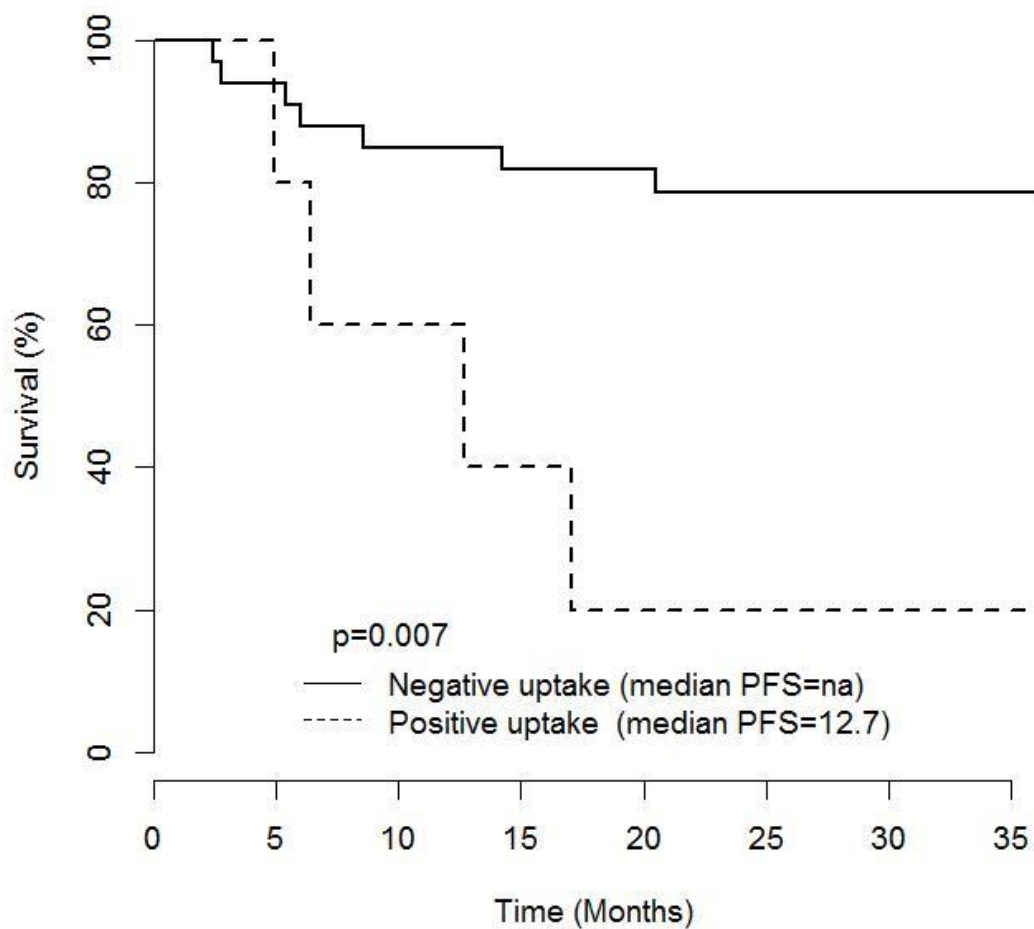

Supplemental Figure 1: PFS Kaplan Meier curves according to interim BM uptake in the 38 patients with focal BM FDG lesions (5 patients with persistence of FDG BM uptake (Positive uptake), 33 patients without any significant BM uptake at interim (Negative uptake)). Log rank test:  $p = 0,007$ .

Supplemental Table 1: Correlations between BM biopsy and PET/CT (among the 178 patients with BM biopsy)

| <b>BM biopsy</b>          | <b>Negative</b> | <b>Positive</b> | <b><i>P value</i></b> |
|---------------------------|-----------------|-----------------|-----------------------|
| <b>Total</b>              | 166             | 12              |                       |
| <b>fPET</b>               |                 |                 |                       |
| <b>Positive</b>           | 32 (19.3%)      | 6 (50.0%)       | <i>0.022</i>          |
| <b>Negative</b>           | 134 (80.7%)     | 6 (50.0%)       |                       |
| <b>dPET</b>               |                 |                 |                       |
| <b>Positive</b>           | 51 (30.7%)      | 1 (8.3%)        | <i>0.185</i>          |
| <b>Negative</b>           | 115 (69.3%)     | 11(91.7%)       |                       |
| <b>Stage according to</b> |                 |                 |                       |
| <b>CT/PET</b>             | 60 (36.1%)      | 0 (0.0%)        |                       |
| <b>Stage II</b>           | 52 (31.3%)      | 6 (50.0%)       | <i>0.021</i>          |
| <b>Stage III</b>          | 54 (32.5%)      | 6 (50.0%)       |                       |
| <b>Stage IV</b>           |                 |                 |                       |

Supplemental Table 2: Clinical correlations according to BM uptake on PET/CT: fPET<sup>+</sup> and dPET<sup>+</sup> groups compared to the overall population.

|                                         | fPET                                                          |                      |       | dPET                                  |                    |        |
|-----------------------------------------|---------------------------------------------------------------|----------------------|-------|---------------------------------------|--------------------|--------|
|                                         | + (n=38)<br>(Pure fPET <sup>+</sup> and f/dPET <sup>+</sup> ) | - (n=142)            | p     | + (n=53)<br>(Pure dPET <sup>+</sup> ) | - (n=127)          | p      |
| Positive bone marrow biopsy (%)         | 6 (15.0)                                                      | 6 (4.3)              | 0.022 | 1 (1.9) <sup>2</sup>                  | 11 (8.7)           | 0.185  |
| Bulky (%)                               | 13 (34.2)                                                     | 64 (45.1)            | 0.309 | 32 (60.4)                             | 45 (35.4)          | 0.004  |
| B Symptoms (%)                          | 34 (89.5)                                                     | 89 (62.7)            | 0.003 | 38 (71.7)                             | 85 (66.9)          | 0.652  |
| Age median (IQR)                        | 41.8 (30.9,49.8)                                              | 38.1 (30.1,48.3)     | 0.468 | 35.6 (28.4,40)                        | 42.4 (33.1,53.7)   | <0.001 |
| Sex, M (%)                              | 21 (55.3)                                                     | 61 (43)              | 0.242 | 17 (32.1)                             | 51 (98.1)          | 0.185  |
| Stage IV (%)                            | --                                                            | --                   | --    | 11 (20.8)                             | 50 (39.4)          | 0.026  |
| Hb (g/dL) mean (SD)                     | 11.5 (1.9)                                                    | 12.5 (2.0)           | 0.013 | 11.7 (1.9)                            | 12.5 (2.1)         | 0.024  |
| WBC (cell/ $\mu$ L) median (IQR)        | 11855 (8475,17037.5)                                          | 10600 (8200,12700)   | 0.056 | 12310 (10982.5,16452.5)               | 9680 (7100,12000)  | <0.001 |
| Lymphocyte (cell/ $\mu$ L) median (IQR) | 1437.8 (1096,1983.1)                                          | 1605 (1138.5,1932.1) | 0.609 | 1575 (1160.4,1917.1)                  | 1571 (1099,1948.7) | 0.759  |
| LDH elevated <sup>1</sup> (%)           | 15 (42.9)                                                     | 35 (28.5)            | 0.158 | 17 (34.7)                             | 33 (30.3)          | 0.713  |
| Albumin, (g/dL) median (IQR)            | 3.7 (3.3,4.1)                                                 | 4.1 (3.6,4.4)        | 0.002 | 4 (3.5,4.2)                           | 4 (3.5,4.4)        | 0.347  |
| Positive Interim PET (%)                | 12 (34.3)                                                     | 38 (27.3)            | 0.547 | 14 (26.4)                             | 36 (29.8)          | 0.79   |
| Progression or relapse (%)              | 12 (32.4)                                                     | 26 (18.3)            | 0.1   | 9 (17)                                | 29 (23)            | 0.483  |
| Alive (%)                               | 35 (92.1)                                                     | 136 (95.8)           | 0.401 | 52 (98.1)                             | 119 (93.7)         | 0.286  |
| Splenic uptake > liver (%)              | 3 (7.9)                                                       | 16 (11.6)            | 0.768 | 11 (20.8)                             | 8 (6.3)            | 0.009  |

Hb: hemoglobin; WB: white blood cells; IQR: InterQuartile Range; <sup>1</sup>over the limits referred by the local laboratory; <sup>2</sup>all of those 3 patients had both dPET<sup>+</sup> and fPET<sup>+</sup>.

Supplemental Table 2: Clinical correlations according to BM uptake on PET/CT: fPET<sup>+</sup> and dPET<sup>+</sup> groups compared to the overall population.

|                                         | fPET                                                          |                      |       | dPET                                  |                    |        |
|-----------------------------------------|---------------------------------------------------------------|----------------------|-------|---------------------------------------|--------------------|--------|
|                                         | + (n=38)<br>(Pure fPET <sup>+</sup> and f/dPET <sup>+</sup> ) | - (n=142)            | p     | + (n=53)<br>(Pure dPET <sup>+</sup> ) | - (n=127)          | p      |
| Positive bone marrow biopsy (%)         | 6 (15.0)                                                      | 6 (4.3)              | 0.022 | 1 (1.9) <sup>2</sup>                  | 11 (8.7)           | 0.185  |
| Bulky (%)                               | 13 (34.2)                                                     | 64 (45.1)            | 0.309 | 32 (60.4)                             | 45 (35.4)          | 0.004  |
| B Symptoms (%)                          | 34 (89.5)                                                     | 89 (62.7)            | 0.003 | 38 (71.7)                             | 85 (66.9)          | 0.652  |
| Age median (IQR)                        | 41.8 (30.9,49.8)                                              | 38.1 (30.1,48.3)     | 0.468 | 35.6 (28.4,40)                        | 42.4 (33.1,53.7)   | <0.001 |
| Sex, M (%)                              | 21 (55.3)                                                     | 61 (43)              | 0.242 | 17 (32.1)                             | 51 (98.1)          | 0.185  |
| Stage IV (%)                            | --                                                            | --                   | --    | 11 (20.8)                             | 50 (39.4)          | 0.026  |
| Hb (g/dL) mean (SD)                     | 11.5 (1.9)                                                    | 12.5 (2.0)           | 0.013 | 11.7 (1.9)                            | 12.5 (2.1)         | 0.024  |
| WBC (cell/ $\mu$ L) median (IQR)        | 11855 (8475,17037.5)                                          | 10600 (8200,12700)   | 0.056 | 12310 (10982.5,16452.5)               | 9680 (7100,12000)  | <0.001 |
| Lymphocyte (cell/ $\mu$ L) median (IQR) | 1437.8 (1096,1983.1)                                          | 1605 (1138.5,1932.1) | 0.609 | 1575 (1160.4,1917.1)                  | 1571 (1099,1948.7) | 0.759  |
| LDH elevated <sup>1</sup> (%)           | 15 (42.9)                                                     | 35 (28.5)            | 0.158 | 17 (34.7)                             | 33 (30.3)          | 0.713  |
| Albumin, (g/dL) median (IQR)            | 3.7 (3.3,4.1)                                                 | 4.1 (3.6,4.4)        | 0.002 | 4 (3.5,4.2)                           | 4 (3.5,4.4)        | 0.347  |
| Positive Interim PET (%)                | 12 (34.3)                                                     | 38 (27.3)            | 0.547 | 14 (26.4)                             | 36 (29.8)          | 0.79   |
| Progression or relapse (%)              | 12 (32.4)                                                     | 26 (18.3)            | 0.1   | 9 (17)                                | 29 (23)            | 0.483  |
| Alive (%)                               | 35 (92.1)                                                     | 136 (95.8)           | 0.401 | 52 (98.1)                             | 119 (93.7)         | 0.286  |
| Splenic uptake > liver (%)              | 3 (7.9)                                                       | 16 (11.6)            | 0.768 | 11 (20.8)                             | 8 (6.3)            | 0.009  |

Hb: hemoglobin; WB: white blood cells; IQR: InterQuartile Range; <sup>1</sup>over the limits referred by the local laboratory; <sup>2</sup>all of those 3 patients had both dPET<sup>+</sup> and fPET<sup>+</sup>.
